# Supplementary material
Source: publisher figshare collection journal article supplement (https://tandf.figshare.com/ndownloader/files/20747364)
Supplement: Supplementary file 1 [file 20747364]

**A dipyrrole derivative from *Aloe vera* inhibits an anti-diabetic drug target Dipeptidyl Peptidase (DPP)-IV *in vitro***

**Figure S1**


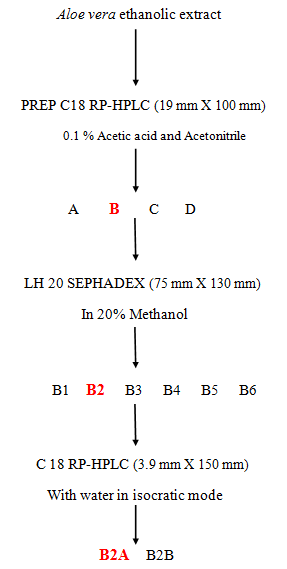


**Supplemental Figure:**

**Figure S1: Schematic representation of the activity guided fractionation of DPP-IV inhibitor from *Aloe vera* ethanolic extract**

*Aloe vera* ethanolic extract was subjected sequential chromatographic steps. The active fraction of each chromatographic step is highlighted in red. The final active fraction B2A was characterized biochemically to determine the kinetics of inhibition.
